# Supplementary material for: Structural analysis of haemoglobin binding by HpuA from the Neisseriaceae family
Source: PubMed Central journal article supplement (PMC4703857; doi:10.1038/ncomms10172), 2015-12-16
Supplement: ncomms10172-s1.pdf [file ncomms10172-s1.pdf]

## Supplementary Figures

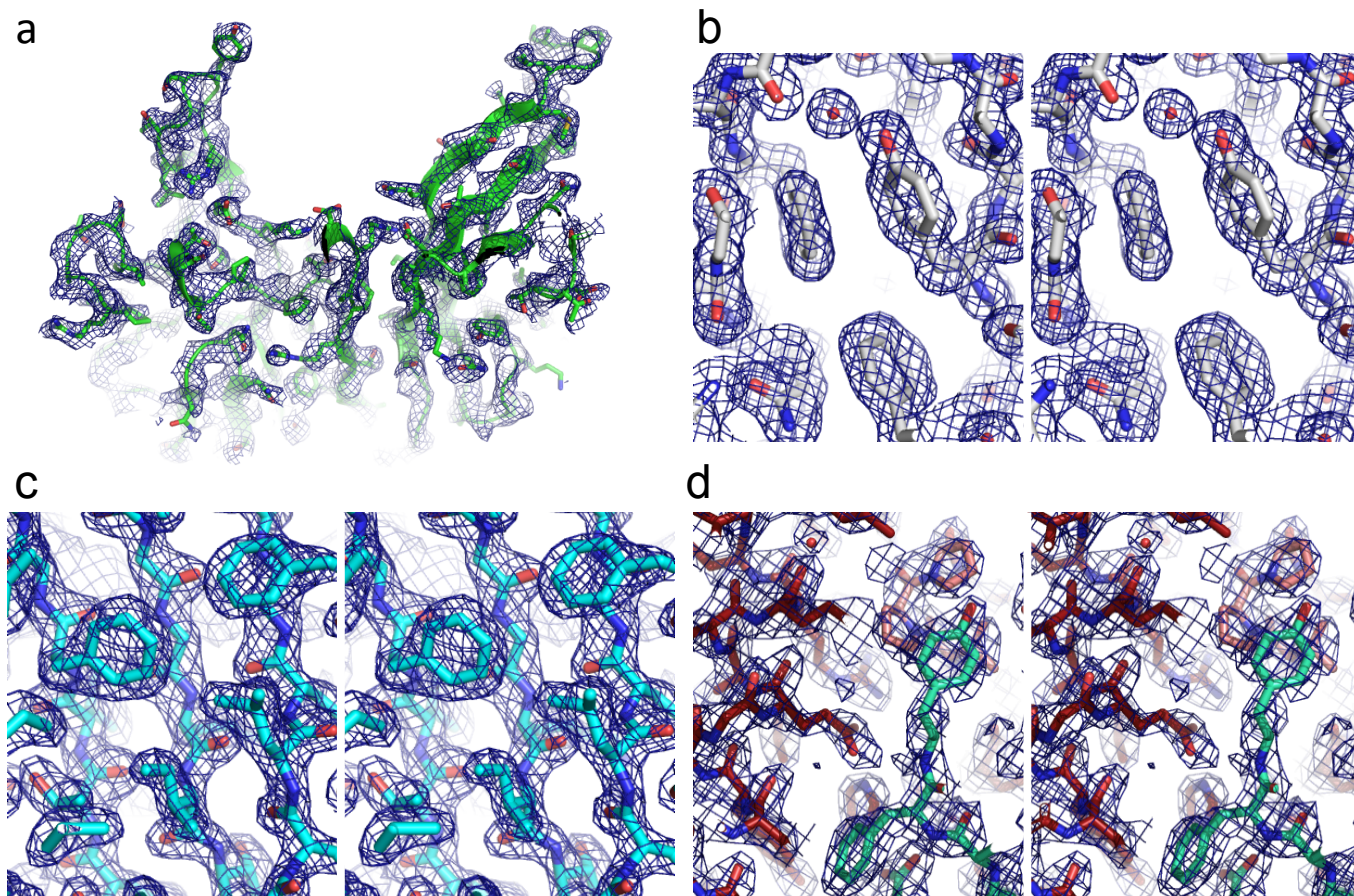

**Supplementary Figure 1** Final atomic coordinates fitted into electron density maps. **(a)** Cartoon and stick representation of the KdHpuA structure in experimental  $2F_0-F_c$  electron density after phasing and solvent flattening by Sharp<sup>1</sup> contoured at  $1 \sigma$ . **(b)** Stick representation of the final KdHpuA structure in final  $2F_0-F_c$  electron density map contoured at  $1 \sigma$ . **(c)** Stereo view of the final structure of NgHpuA-C (cyan), fitted in the final  $2F_0-F_c$  electron density map contoured at  $1 \sigma$ . **(d)** Stereo view of the final structure of KdHpuA (teal) and Hb (red) in complex, fitted in the final  $2F_0-F_c$  electron density map contoured at  $1 \sigma$ .

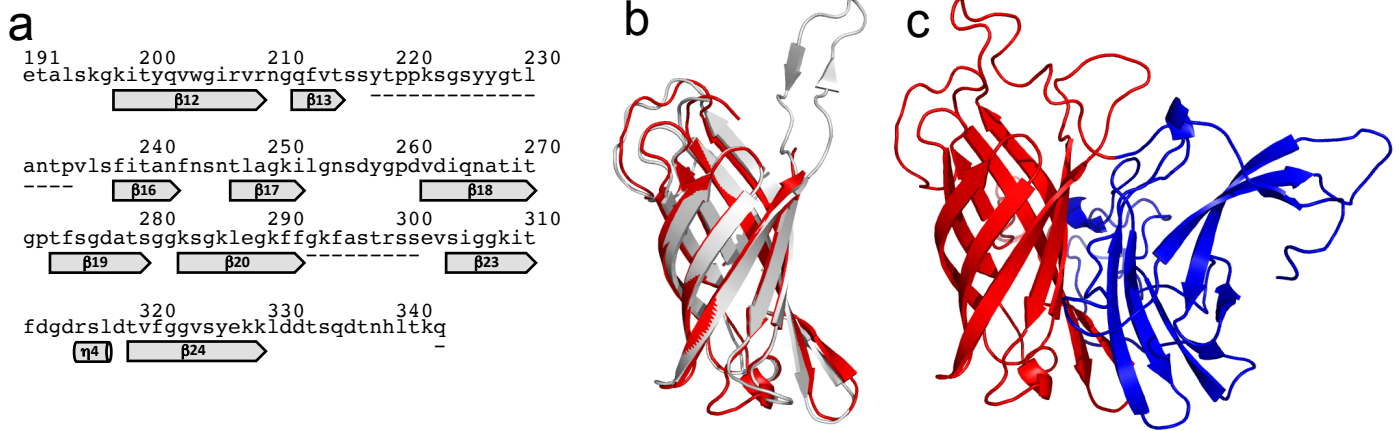

**Supplementary Figure 2** The structure of *N. gonorrhoeae* HpuA. **(a)** Sequence of the construct of NgHpuA-C indicating regions of secondary structure (cylinders and arrows) and regions not visible in the electron density (dashes). **(b)** Crystal structure of NgHpuA-C (red) superposed with the equivalent region of KdHpuA (white). **(c)** Full length model of NgHpuA composed from the crystal structure of NgHpuA-C (red) with a homology model of the N-terminal sequence (blue) based on the KdHpuA structure.

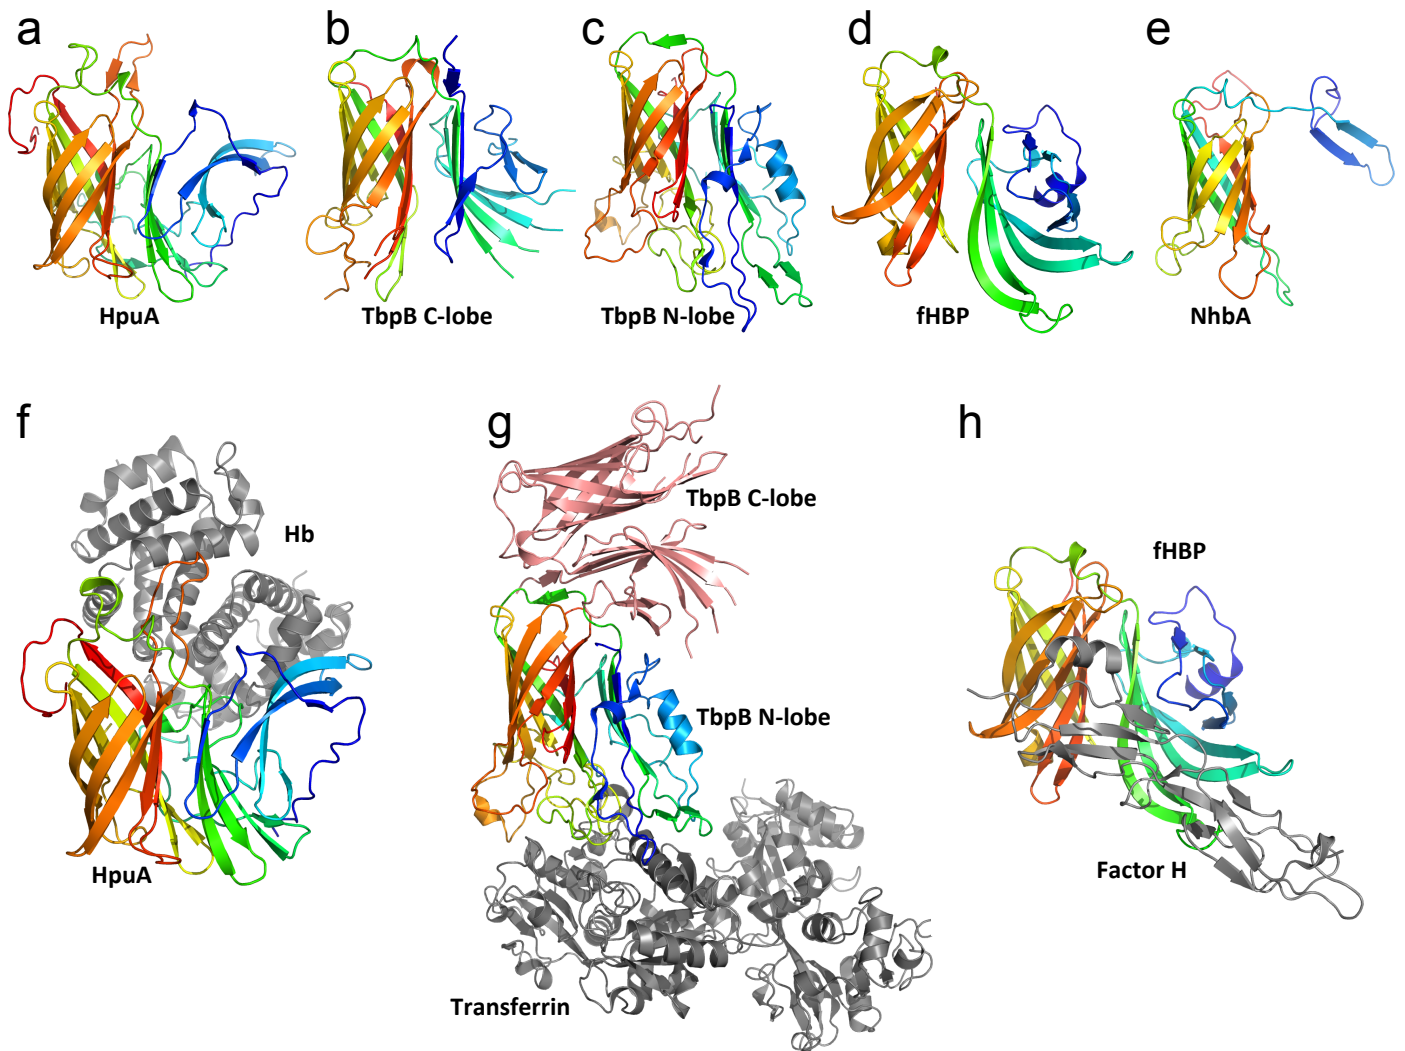

**Supplementary Figure 3** Comparison of KdHpuA with TbpB (pdb id 3VE1<sup>2</sup>), Factor H binding protein (2W80<sup>3</sup>) and Nhba (2LFU<sup>4</sup>). Rainbow cartoon representations of HpuA (a), TbpB C-lobe (b), TbpB N-lobe (c), Factor H binding protein (d) and Nhba (e) structures aligned according to secondary structure elements demonstrate the conserved fold. HpuA bound to Hb (f), TbpB N-lobe bound to transferrin (g) and Factor H binding protein bound (fHBP) to Factor H (h) are colored and aligned as in the earlier panels to demonstrate the different binding interfaces for their respective ligands (in gray).



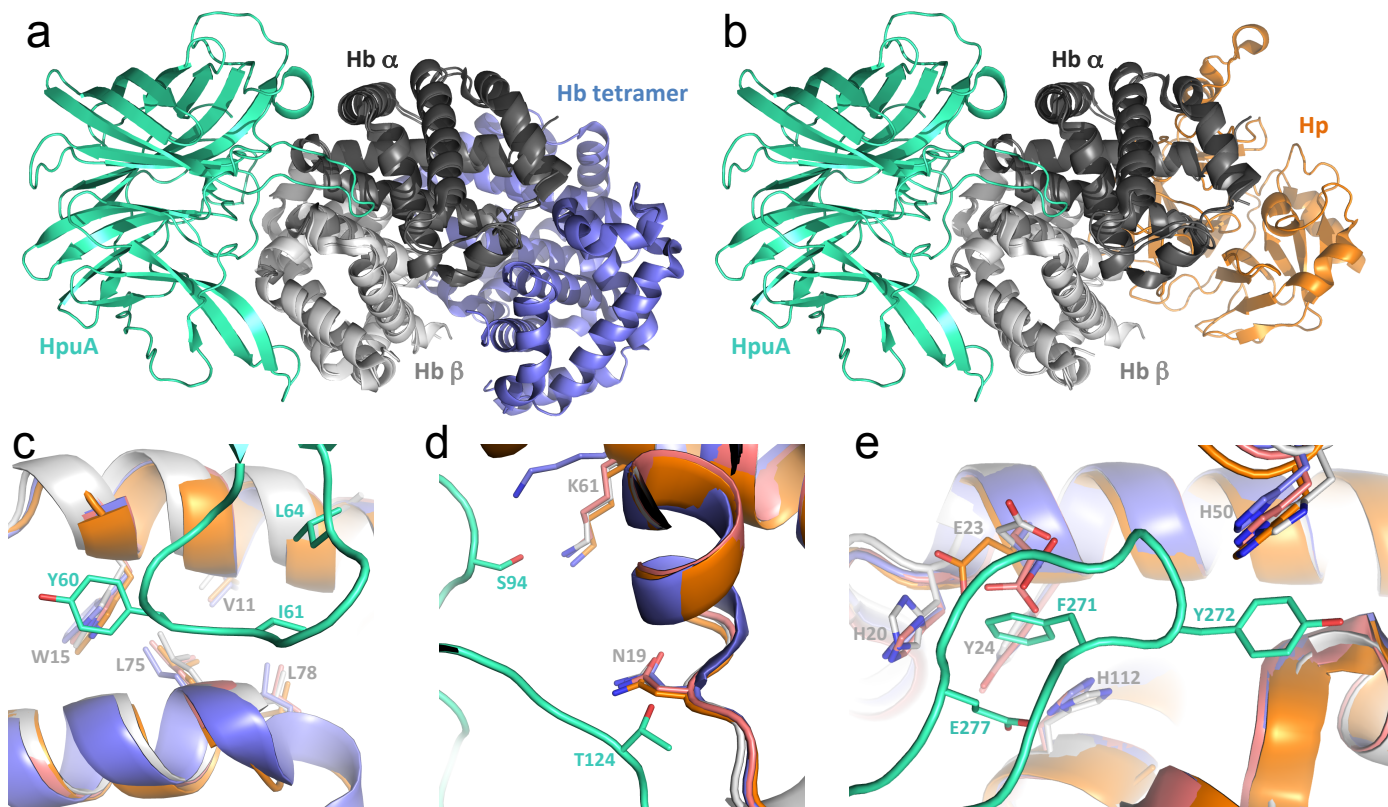

**Supplementary Figure 4** HpuA binding modeled on different forms of Hb. **(a)** The HpuA:Hb structure (cyan and gray) is superposed with an isolated deoxygenated Hb tetramer structure (2dn2<sup>5</sup>) revealing no clash between HpuA and the second Hb dimer. **(b)** A similar alignment of HpuA:Hb onto Hb:Hp (4X0L<sup>6</sup>), again revealing no clash between HpuA and the host Hb binding protein. **(c)** Zoomed in view of HpuA loop-1 interacting with Hb (gray). The superposed structures of oxygenated Hb (pink, 2dn1<sup>5</sup>), deoxygenated Hb (blue) and Hp-bound Hb (orange) reveal no significant movement of the HpuA-interacting residues. **(d)** and **(e)** respectively show similar detailed views of the loop-3 and loop-5 interacting regions.



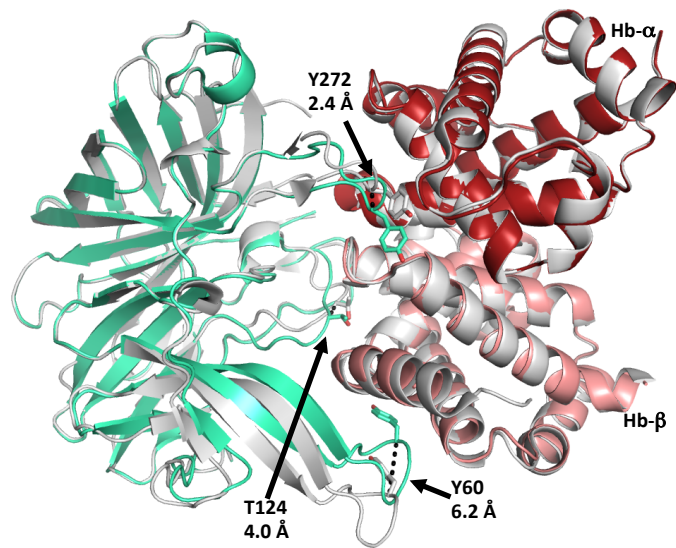

**Supplementary Figure 5** Comparison of KdHpuA and Hb (pdb 1bbb<sup>7</sup>) structures alone (gray) and in the KdHpuA:Hb complex (cyan and red respectively). The movements of loop-1, -3 and -5 of KdHpuA are indicated by black dashes and the side chains of key residues are shown as stick representations.

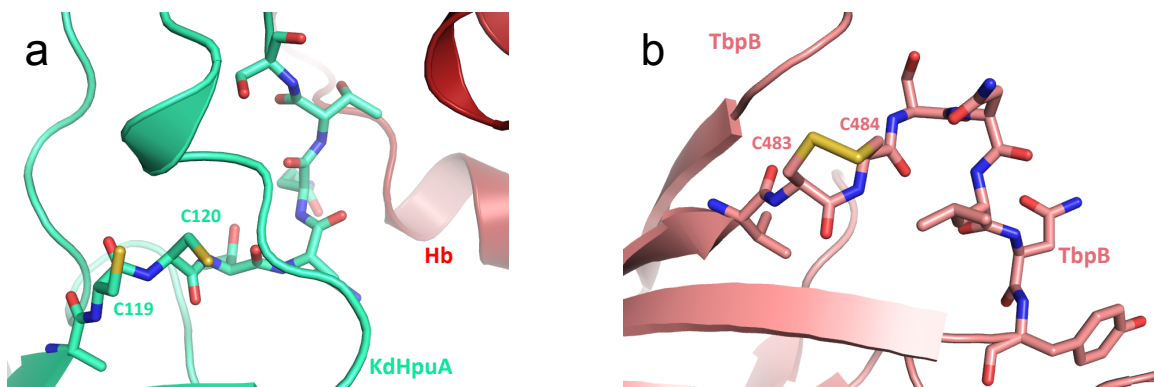

**Supplementary Figure 6** Comparison of the loop containing the Cys-Cys motif of HpuA and TbpB. **(a)** Close up of loop-2 of KdHpuA (cyan), in complex with Hb (dark red). **(b)** The equivalent region of TbpB C-lobe showing the disulfide formed in the Cys-Cys motif (pdb id 3VE2<sup>2</sup>).

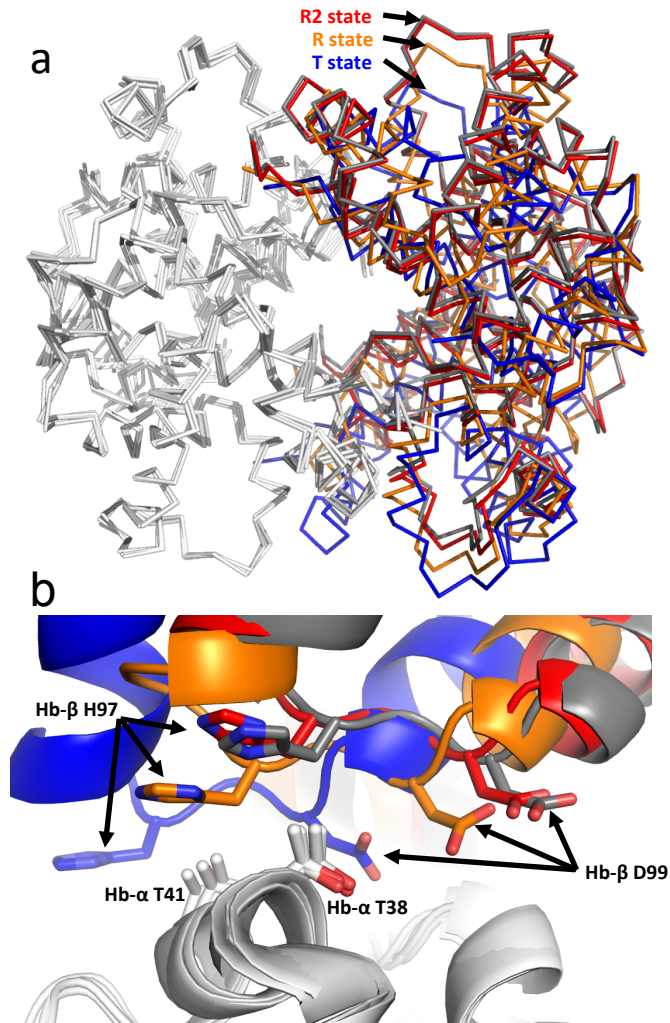

**Supplementary Figure 7** The quaternary structure of Hb in complex with HpuA is the R2 state. Superposition of HpuA:Hb structure (white and gray) on Hb in the T-state (white and blue, pdb id 2dn2<sup>5</sup>), R state (white and orange, pdb id 2dn1<sup>5</sup>) and R2 state (white and red, pdb id 1bbb<sup>7</sup>). In both panels, one superposed  $\alpha/\beta$  Hb dimer of each structure is shown in white. **(a)** Overall tetrameric structures shown as ribbon representation, the 2<sup>nd</sup> half of the Hb tetramer in complex with HpuA (gray) aligns well with the R2 state tetramer (red). **(b)** Zoomed view of the 'switch' region of the same superposed structures. Stick representations are shown of side chains important for the 'switch'.

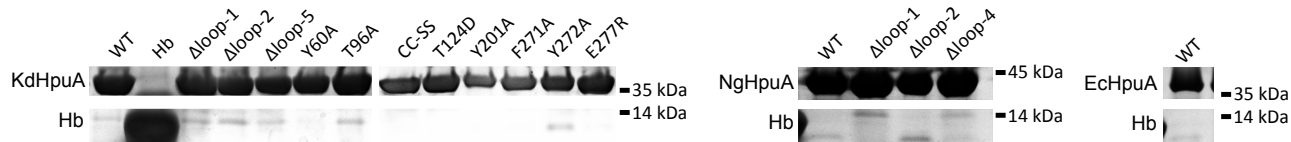

**Supplementary Figure 8** Input samples from pull down experiments shown in **Figure 5**. The position of molecular weight markers are shown to the right of each gel slice.

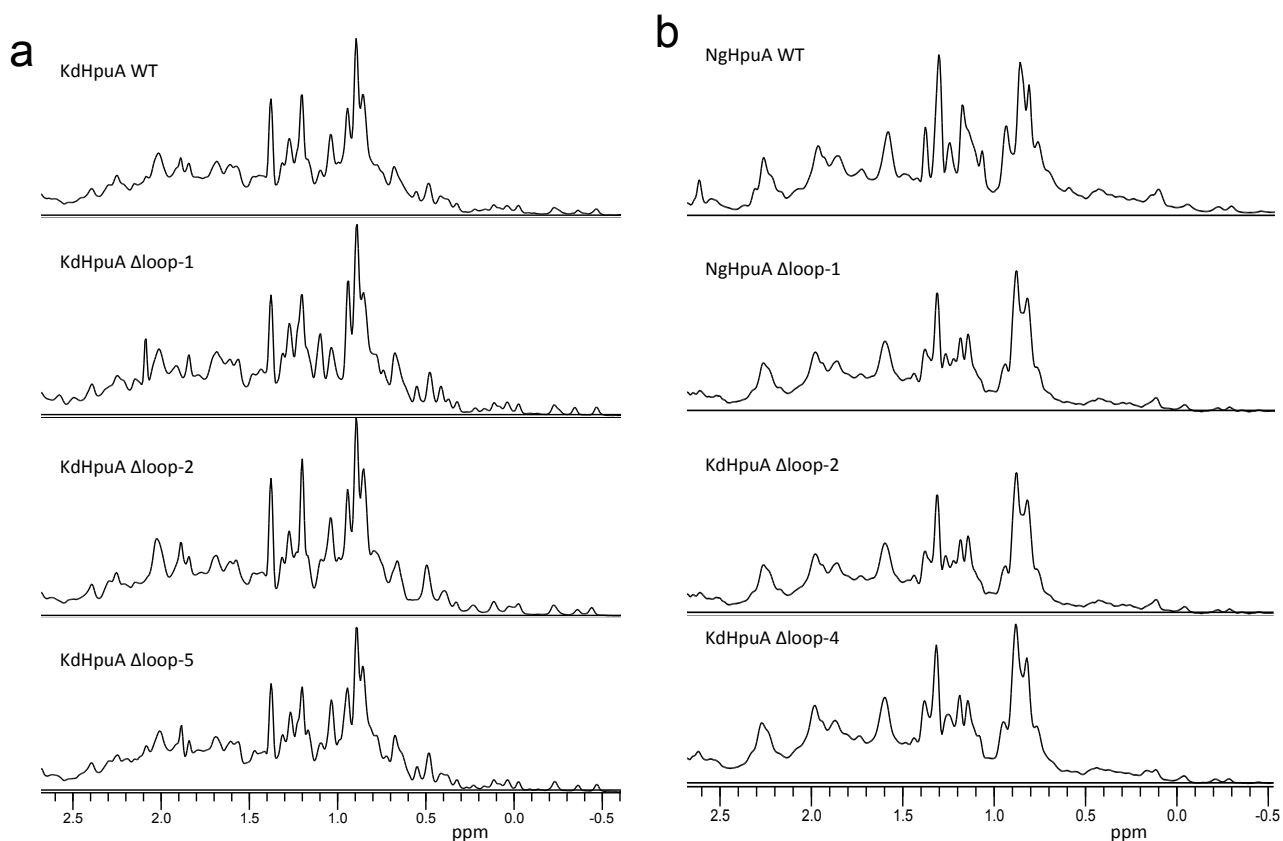

**Supplementary Figure 9** Proton NMR spectra of KdHpuA and NgHpuA proteins. **(a)** Methyl region of proton NMR spectra of wild type,  $\Delta$ loop-1,  $\Delta$ loop-2 and  $\Delta$ loop-5 KdHpuA proteins. **(b)** Methyl region of proton NMR spectra of wild type,  $\Delta$ loop-1,  $\Delta$ loop-2 and  $\Delta$ loop-4 NgHpuA proteins.



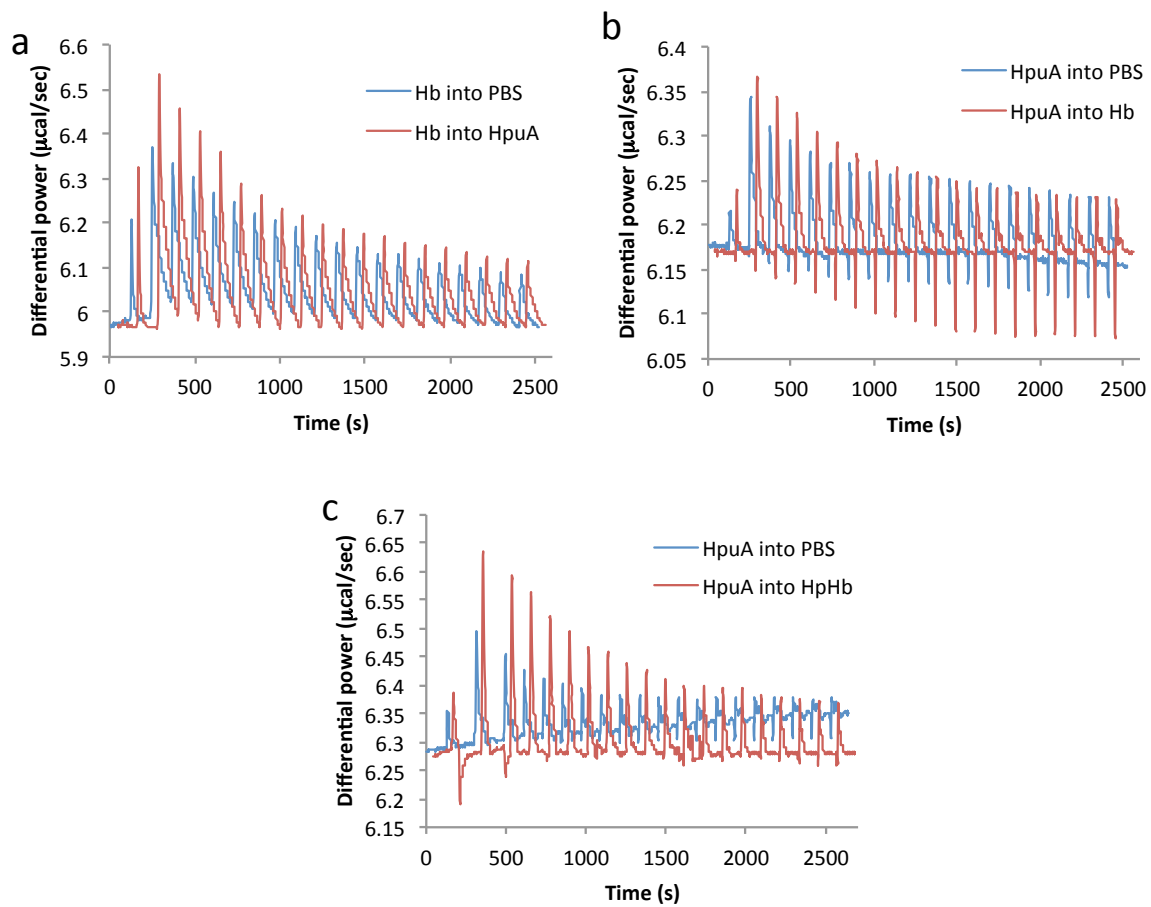

**Supplementary Figure 10** Raw data from ITC experiments. (a) Hb titrated into KdHpuA, (b) KdHpuA titrated into Hb and (c) KdHpuA titrated into Hb:Hp. Each chart shows the experimental injections in blue and the control injections in red.

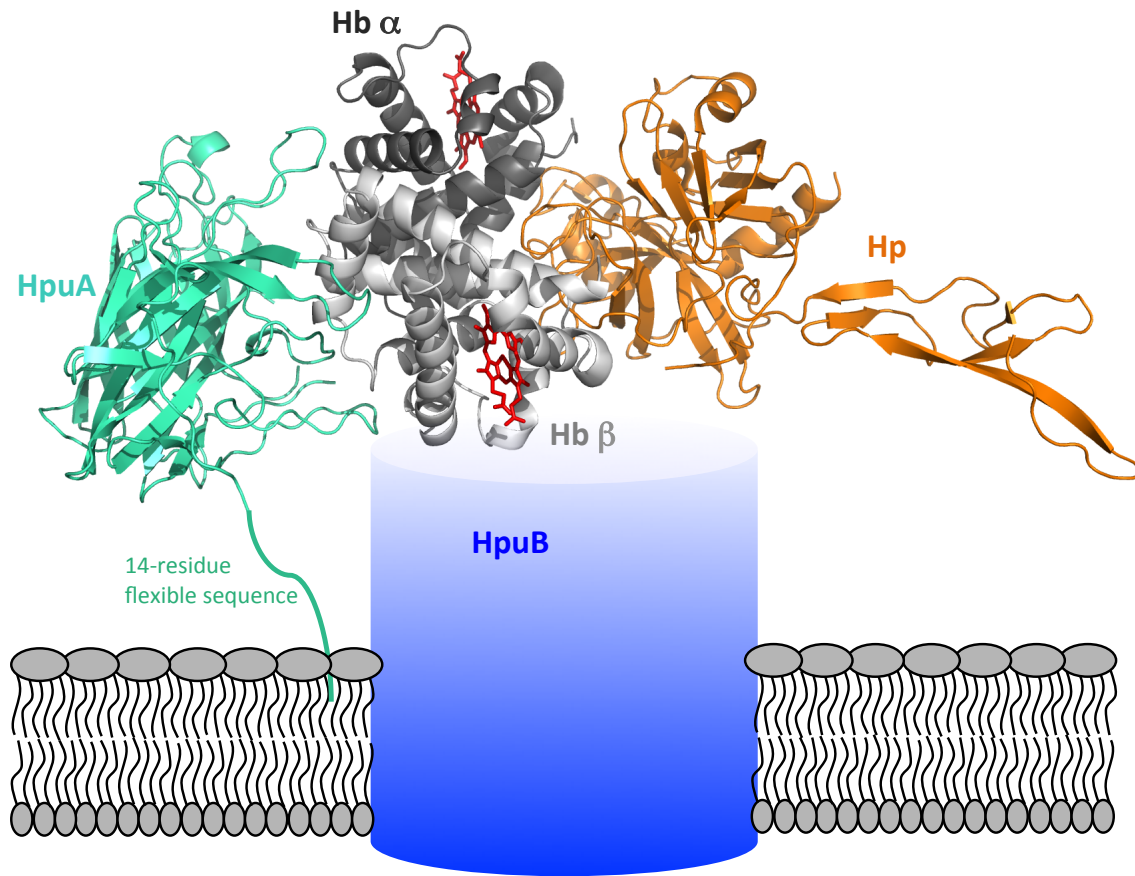

**Supplementary Figure 11** Model of KdHpuA (cyan) associated with the membrane and bound to Hb (gray) and Hp (orange). The proposed position of HpuB ready to import the heme from Hb- $\beta$  is shown as a blue cylinder.

**Supplementary Table 1 Interactions between KdHpuA and Hb**

|                | HpuA          | Hb              | Distance | Type*       |
|----------------|---------------|-----------------|----------|-------------|
| Loop-1         | Ser58         | $\beta$ Thr12   | 2.8      | vdw         |
|                | Tyr60         | $\beta$ Trp15   | 3.6      | vdw         |
|                |               | $\beta$ Ser72   | 3.8      | vdw         |
|                |               | $\beta$ Val20   | 3.3      | vdw         |
|                |               | $\beta$ Ala76   | 3.5      | vdw         |
|                |               | $\beta$ Thr12   | 3.7      | vdw         |
|                | Ile61         | $\beta$ Leu75   | 3.4      | vdw         |
|                |               | $\beta$ Thr12   | 3.7      | vdw         |
| Leu64          | $\beta$ Thr12 | 3.8             | vdw      |             |
| Leu66          | $\beta$ Thr12 | 3.8             | vdw      |             |
|                | $\beta$ Ser9  | 3.7             | vdw      |             |
| Loop-2         | Ser94         | $\beta$ Lys61   | 2.5      | H-bond      |
|                | Ser95         | $\beta$ Gly56   | 3.4      | vdw         |
| Loop-3         | Asn122        | $\beta$ Lys17   | 3.8      | vdw         |
|                | Gln123        | $\beta$ Lys17   | 3.4      | vdw         |
|                |               | $\beta$ Gly16   | 3.4      | vdw         |
|                |               | $\beta$ Val18   | 3.6      | vdw         |
|                | Thr124        | $\beta$ Lys17   | 3.1      | H-bond      |
|                |               | $\beta$ His117  | 3.7      | vdw         |
|                |               | $\beta$ Val23   | 3.6      | vdw         |
|                |               | $\beta$ Asn19   | 3.2      | H-bond      |
|                |               | $\beta$ Phe118  | 3.6      | vdw         |
|                | Ser125        | $\beta$ His117  | 3.4      | vdw         |
|                | Thr126        | $\beta$ Glu26   | 3.8      | vdw         |
| $\beta$ His117 |               | 3.6             | vdw      |             |
| Loop-5         | Phe271        | $\alpha$ Glu23  | 3.6      | vdw         |
|                |               | $\alpha$ Glu27  | 4.0      | vdw         |
|                |               | $\alpha$ His112 | 3.3      | vdw         |
|                |               | $\alpha$ Tyr24  | 3.7      | vdw         |
|                |               | $\alpha$ His20  | 3.6      | vdw         |
|                | Tyr272        | $\beta$ Pro124  | 3.4      | vdw         |
|                |               | $\beta$ Thr123  | 3.9      | vdw         |
|                |               | $\beta$ Pro125  | 3.4      | vdw         |
|                |               | $\alpha$ Glu30  | 3.3      | vdw         |
|                |               | $\alpha$ His50  | 3.7      | H-bond      |
|                | Ser273        | $\alpha$ Glu23  | 2.9      | H-bond      |
|                | Thr275        | $\alpha$ Glu23  | 2.5      | H-bond      |
|                | Glu277        | $\alpha$ His112 | 2.7      | Salt bridge |
|                |               | $\alpha$ His20  | 3.8      | H-bond      |

\* vdw = van der Waal's interaction, H-bond = hydrogen bond



## Supplementary References

1. Bricogne G, Vonrhein C, Flensburg C, Schiltz M, Paciorek W. Generation, representation and flow of phase information in structure determination: recent developments in and around SHARP 2.0. *Acta Crystallogr D Biol Crystallogr* **59**, 2023-2030 (2003).
2. Calmettes C, Alcantara J, Yu RH, Schryvers AB, Moraes TF. The structural basis of transferrin sequestration by transferrin-binding protein B. *Nat Struct Mol Biol* **19**, 358-360 (2012).
3. Schneider MC, *et al.* Neisseria meningitidis recruits factor H using protein mimicry of host carbohydrates. *Nature* **458**, 890-893 (2009).
4. Esposito V, *et al.* Structure of the C-terminal domain of Neisseria heparin binding antigen (NHBA), one of the main antigens of a novel vaccine against Neisseria meningitidis. *J Biol Chem* **286**, 41767-41775 (2011).
5. Park SY, Yokoyama T, Shibayama N, Shiro Y, Tame JR. 1.25 Å resolution crystal structures of human haemoglobin in the oxy, deoxy and carbonmonoxy forms. *J Mol Biol* **360**, 690-701 (2006).
6. Lane-Serff H, MacGregor P, Lowe ED, Carrington M, Higgins MK. Structural basis for ligand and innate immunity factor uptake by the trypanosome haptoglobin-haemoglobin receptor. *Elife* **3**, e05553 (2014).
7. Silva MM, Rogers PH, Arnone A. A third quaternary structure of human hemoglobin A at 1.7-Å resolution. *J Biol Chem* **267**, 17248-17256 (1992).
